# Supplementary material for: PbS sensitized TiO2nanotube arrays with different sizes and filling degrees for enhancing photoelectrochemical properties
Source: Royal Society of Chemistry journal article supplement (doi:10.1039/c4cp03342f), 2014-09-30
Supplement: c4cp03342f1.pdf [file c4cp03342f1.pdf]

## Supporting Information

---

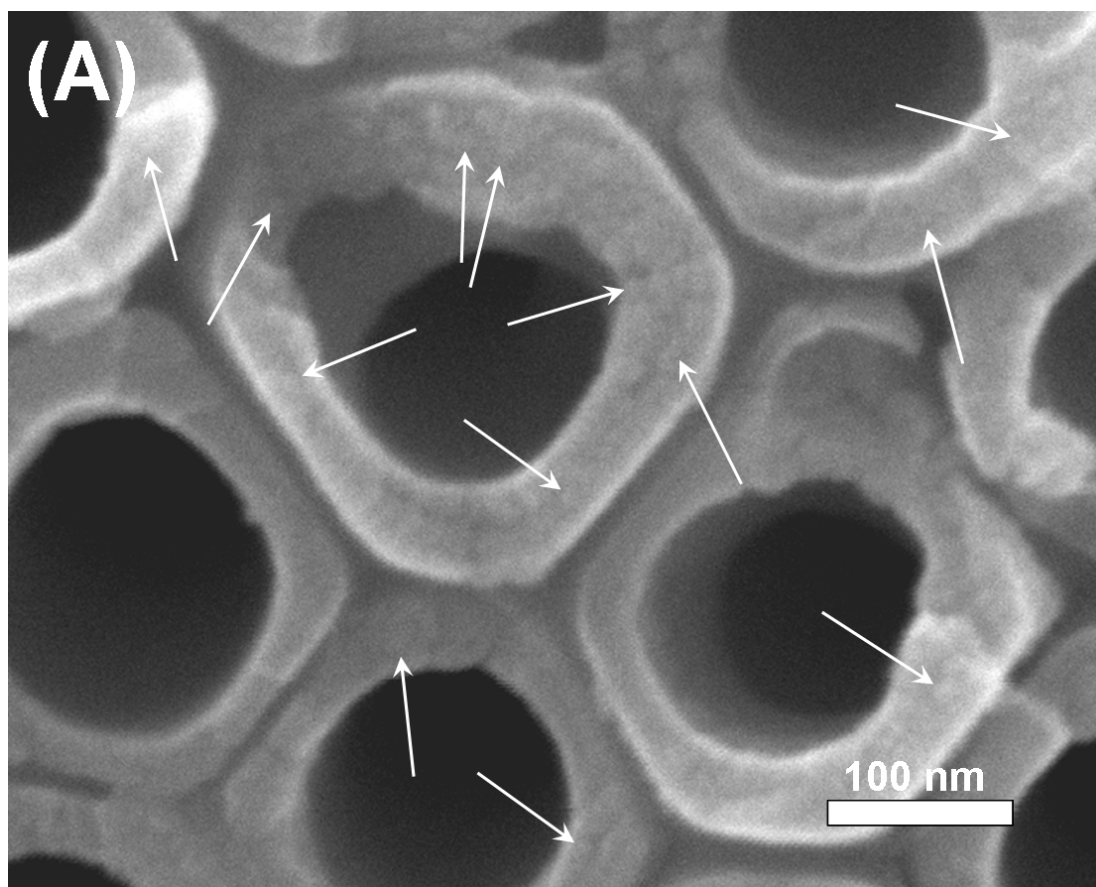

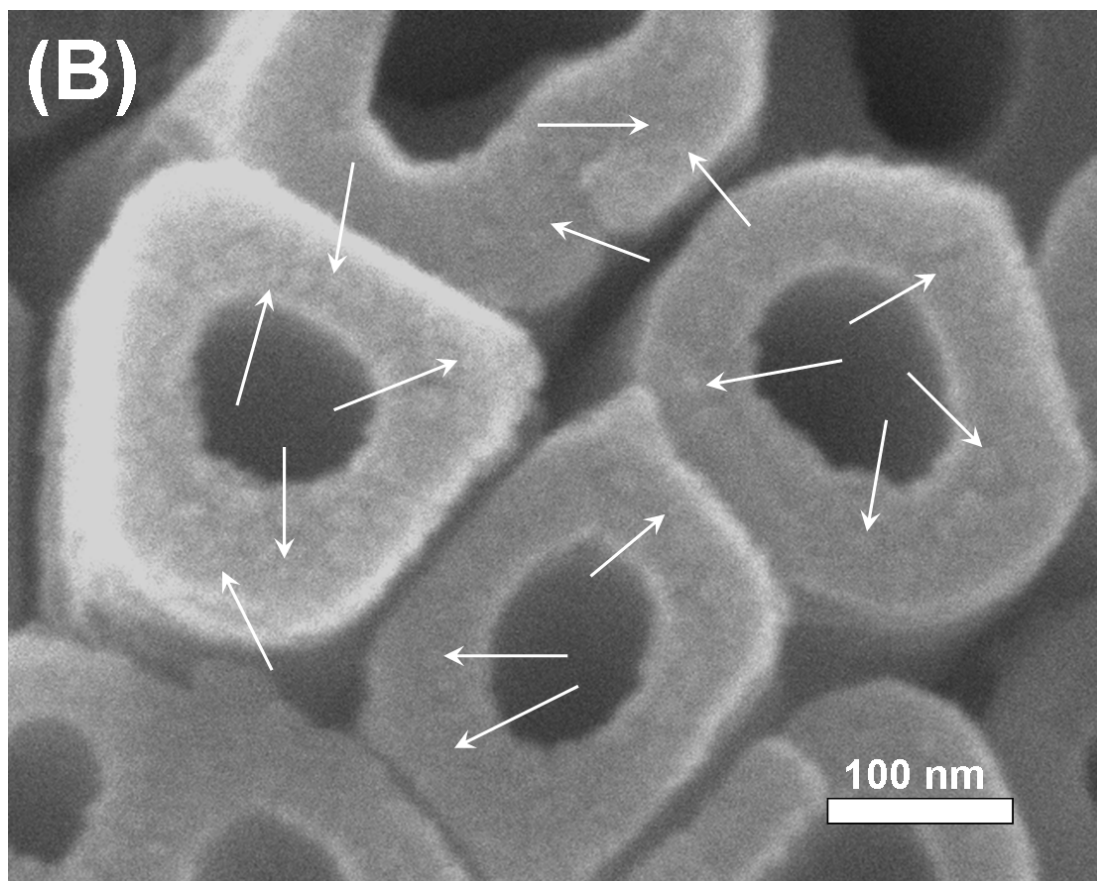

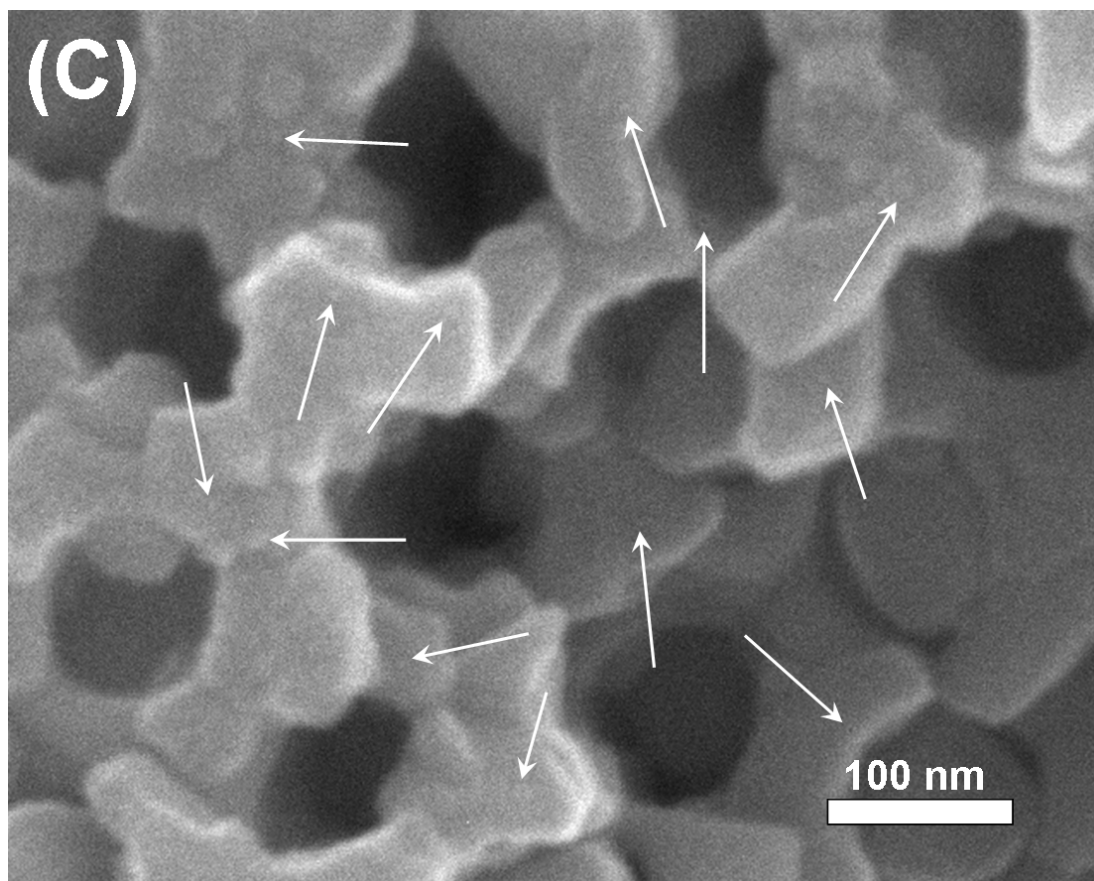

Figure S1. High-resolution FESEM images of PbS(N) NPs/TiO<sub>2</sub> NAs (A, B, and C for N = 5, 10, and 15, respectively).

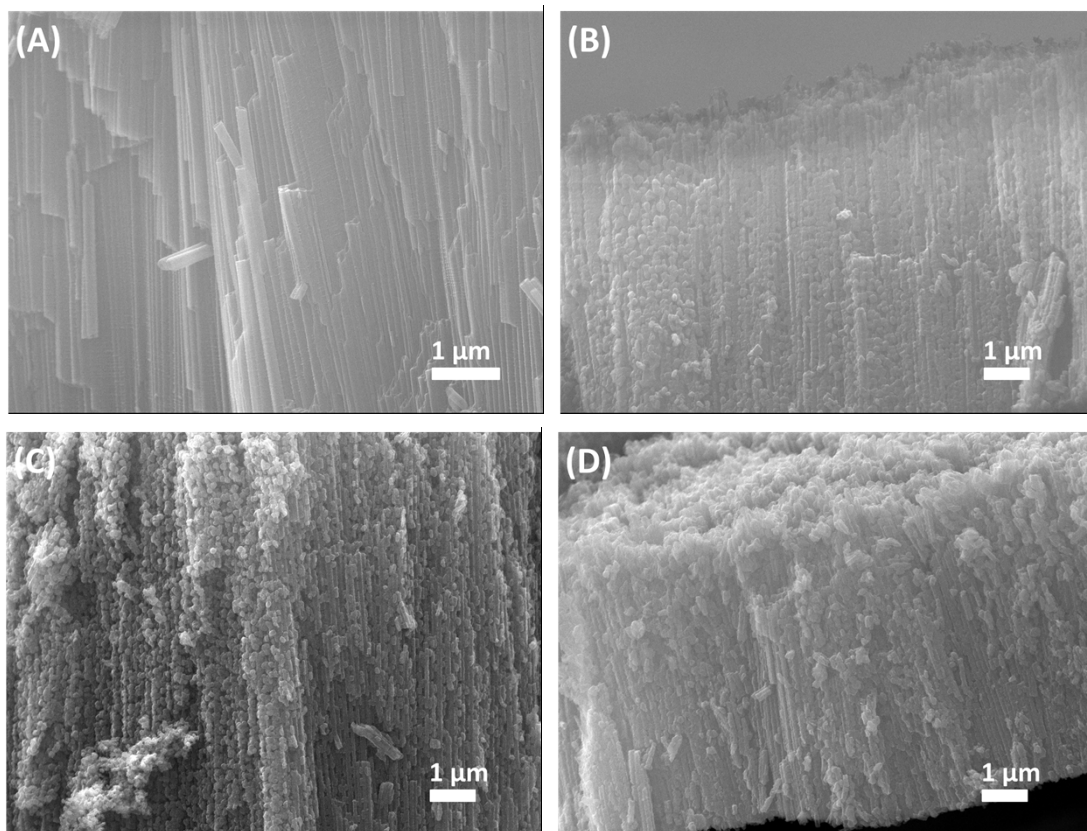

Figure S2. Cross-section FESEM images of pure TiO<sub>2</sub> NAs (A) and PbS(N) NPs/TiO<sub>2</sub> NAs (B, C, and D for n = 5, 10, and 15, respectively).

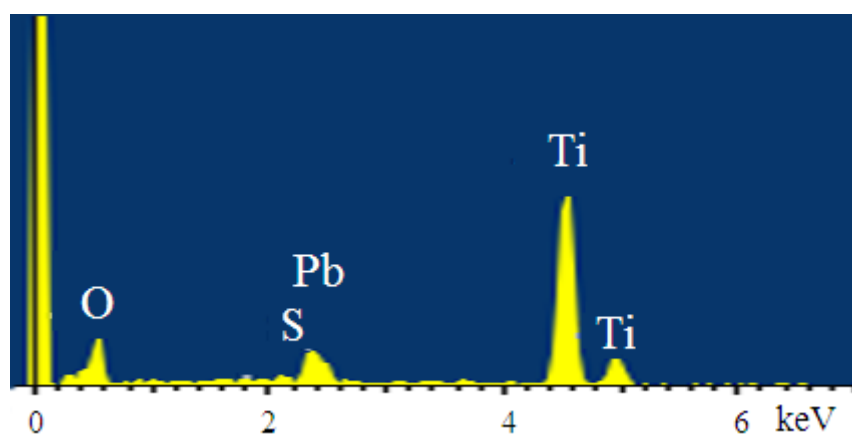

Figure S3. EDX analysis of the marked region in Figure 3A.

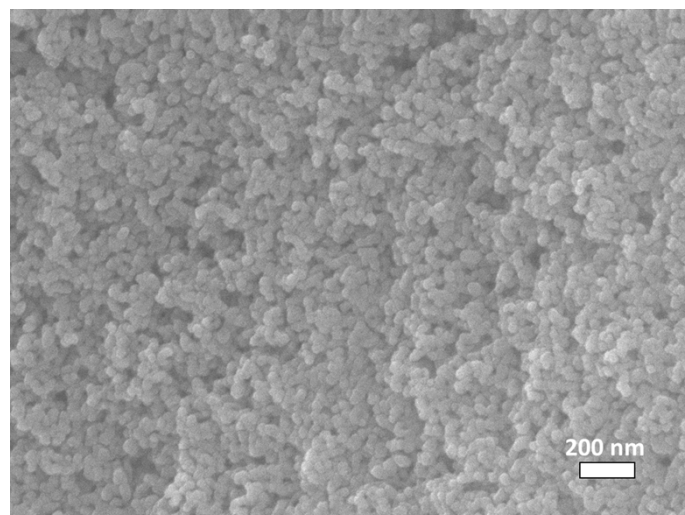

Figure S4. FESEM image of pure PbS NPs.

---

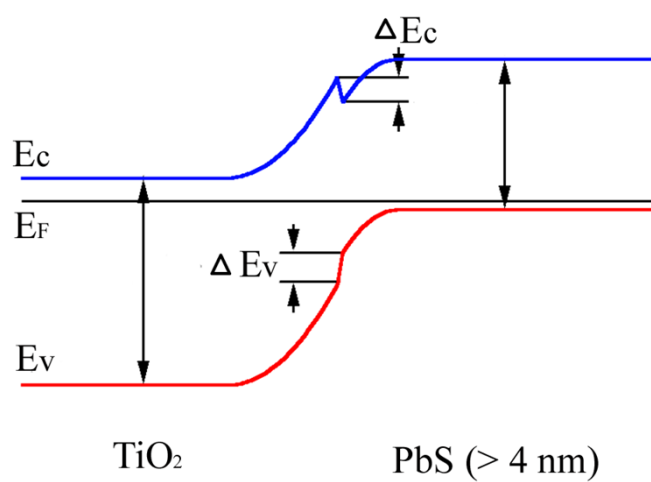

Figure S5. Energy band structure diagram of  $\text{TiO}_2$  NAs and  $\text{PbS}$  NPs ( $> 4 \text{ nm}$ ) at the equilibrium.

---

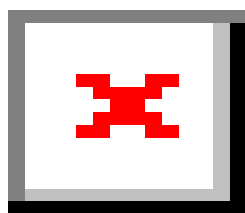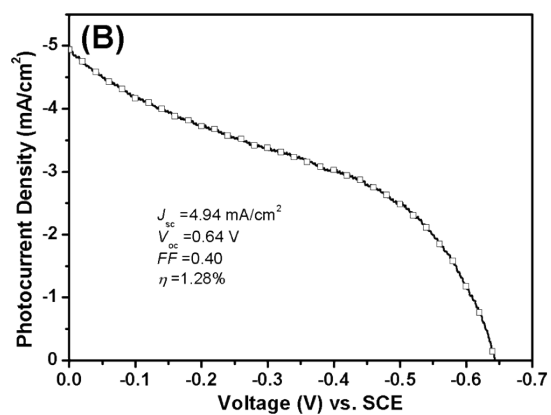

Figure S6. FESEM image (A) and the  $J$ - $V$  curve (B) of PbS/TiO<sub>2</sub> NAs.
